# Supplementary material for: A semi-encapsulated PdRh alloy heterojunction for the selective catalytic hydrogenation of nitrophenylacetylene to nitrostyrene
Source: Royal Society of Chemistry journal article supplement (doi:10.1039/d2dt02230c), 2022-01-01
Supplement: d2dt02230c1.pdf [file d2dt02230c1.pdf]

# SUPPORTING INFORMATION

Semi-Encapsulated PdRh Alloy Heterojunction for the Selectively Catalytic  
Hydrogenation of Nitrophenylacetylene to Nitrostyrene

Wenhui Zhang;<sup>a</sup> Yiming Wang;<sup>a</sup> Kelong Ding;<sup>a</sup> Hong Li;<sup>a</sup> Zejun Sun;<sup>a</sup> Ze-Nan Hu<sup>a,b\*</sup>  
Hong-bin Sun<sup>a,\*</sup>

<sup>a</sup> Department of Chemistry, Northeastern University, Shenyang 110819, People's  
Republic of China; E-mail: [sunhb@mail.neu.edu.cn](mailto:sunhb@mail.neu.edu.cn)

<sup>b</sup> School of Environmental Engineering and Chemistry, Luoyang Institute of Science  
and Technology, Luoyang, Henan 471023, People's Republic of China; E-mail:  
1901714885@qq.com

## Contents:

### Experimental Section

#### 1. Synthesis of TCPP

#### 2. Catalyst characterization

**Fig. S1** (a and d) Powder X-ray diffraction pattern analysis (PXRD) of Rh@PCN-222-Pd (0.25 Pd) and Rh@PCN-222-Pd (0.5 Pd); (b) SEM of Rh@PCN-222-Pd (0.25 Pd); (c) FT-IR spectra of Rh@PCN-222-Pd (0.25 Pd) and TCPP.

**Fig. S2** The SEM of Pd-Rh@PC (0.25 Pd).

**Fig. S3** Elemental mapping of Pd-Rh@PC (0.25 Pd).

**Fig. S4** Elemental mapping of Pd-Rh@PC (0.25 Pd).

**Fig. S5** Lattice spacing of Pd-Rh@PC (0.25 Pd).

**Fig. S6** The HRTEM image of Pd-Rh@PC (0.25 Pd).

**Fig. S7** XPS spectra of C 1s of (a) Pd-Rh@PC (0.5 Pd), (b) Pd-Rh@PC (0.25 Pd), (c) Rh@PC and (d) Pd@PC (0.25 Pd), respectively; XPS spectra of Pd 3d of Pd@PC (0.25 Pd) and Rh 3d of Rh@PC.

**Fig. S8** XPS spectra of (a)Pd 3d, (b) Rh 3d and (c) N 1s of Pd-Rh@PC (0.5 Pd).

**Fig. S9** (a) Different solvents for catalytic reactions; (b) Catalytic reactions at different temperatures.

**Fig. S10** Solubility Phase Diagram of Pd-Rh.

## 1. Synthesis of TCPP:

4-carboxybenzaldehyde (3.0 g) was dispersed into 50 mL propionic acid in a 100 mL round bottom flask. After the solid was fully dissolved, 1.4 mL of pyrrole was added drop by drop to the mixed solution. Then the mixture was put into an oil bath and heated at 140 °C for 12 h. The product was cooled to room temperature and filtered. It was washed three times with deionized water and three times with a small amount of acetone. Finally, vacuum dried at 60 °C for 24 h to obtain black powder.

## 2. Catalyst characterization

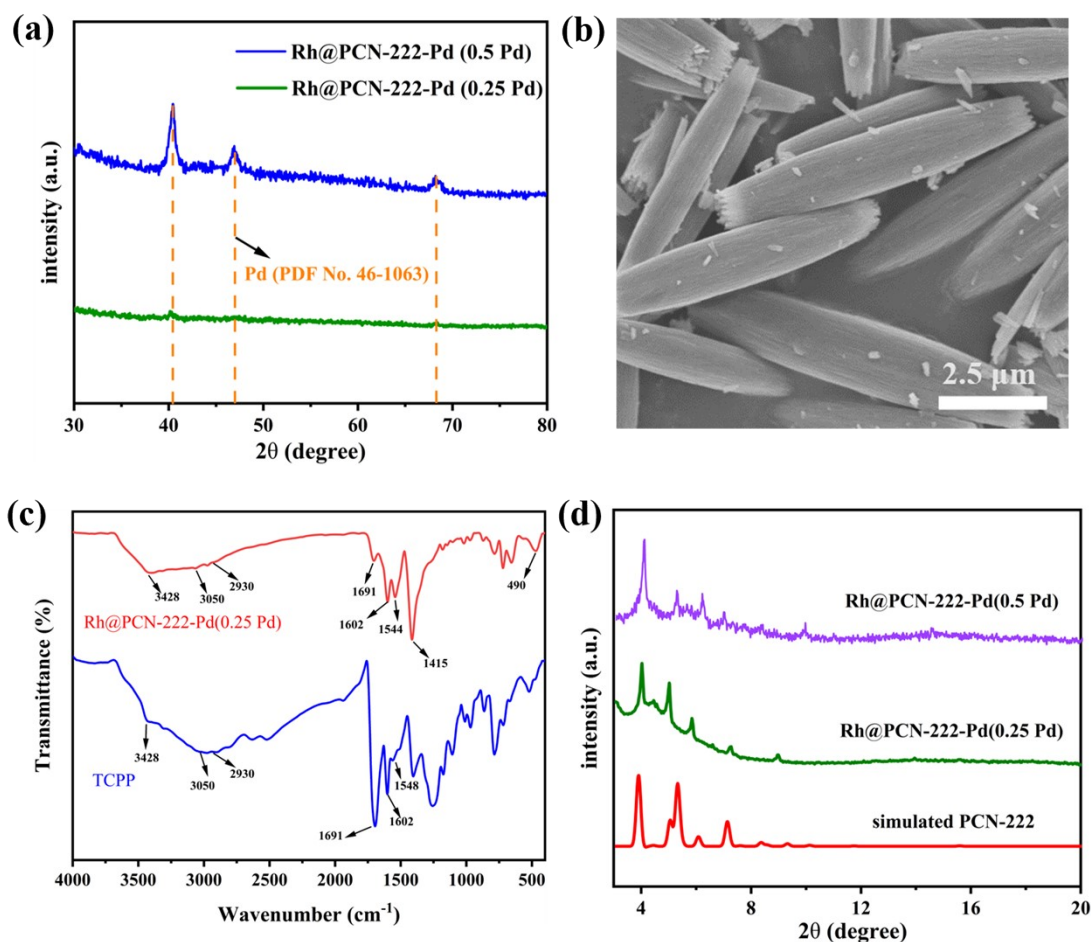

Fig. S1 (a and d) Powder X-ray diffraction pattern analysis (PXRD) of Rh@PCN-222-Pd (0.25 Pd) and Rh@PCN-222-Pd (0.5 Pd); (b) SEM of Rh@PCN-222-Pd (0.25 Pd); (c) FT-IR spectra of Rh@PCN-222-Pd (0.25 Pd) and TCPP.

It could be found that the peaks at  $3428\text{ cm}^{-1}$  corresponds to the stretching vibration of active H containing groups, N-H and O-H<sup>1</sup>. The two characteristic peaks at  $3050$  and  $2930\text{ cm}^{-1}$  arise from the C-H stretching of the aromatic ring<sup>2</sup>. The results show that the peak located at  $1691\text{ cm}^{-1}$  is assigned to the imine group (C=N bond), which is included in the porphyrin ring structure, and the peak appearing at  $1602\text{ cm}^{-1}$  is caused by the skeleton characteristic absorption peak of the benzene ring. The peaks at  $1544\text{ cm}^{-1}$  and  $1415\text{ cm}^{-1}$  correspond to the asymmetric and symmetric

stretching vibrations of multielectron conjugate  $\text{-COO}^-$ , respectively<sup>3</sup>. Meanwhile, the peak at  $490\text{ cm}^{-1}$  could be attributed to the Zr-O bonds of PCN-222 (Fig. S1 c)<sup>4</sup>.

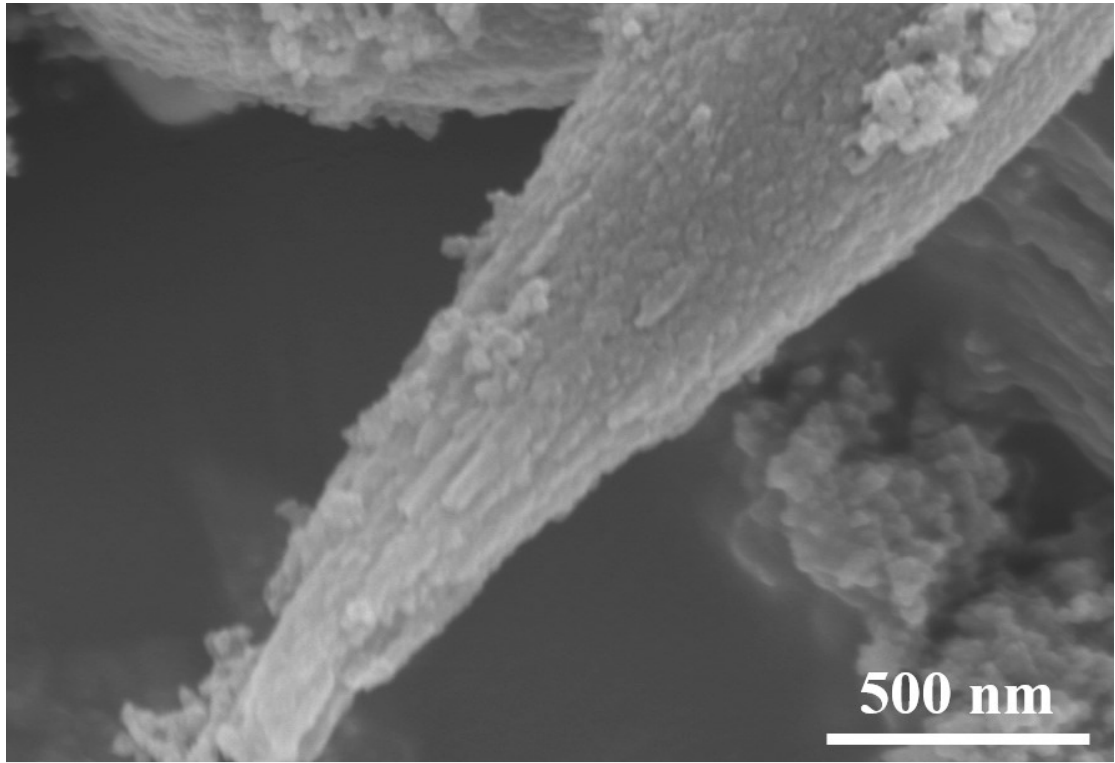

Fig. S2 The SEM of Pd-Rh@PC (0.25 Pd).

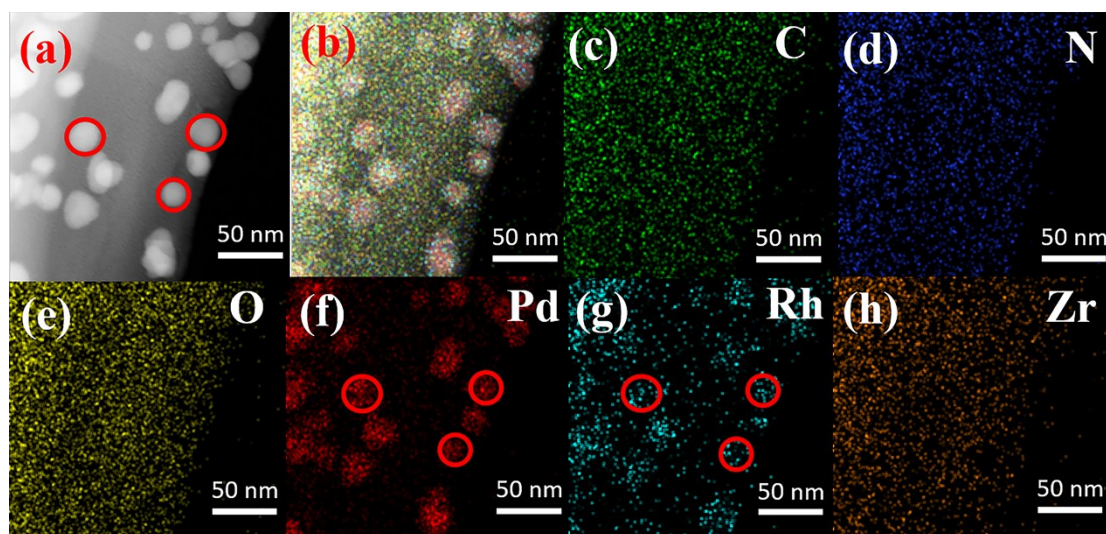

Fig. S3 Elemental mapping of Pd-Rh@PC (0.25 Pd).

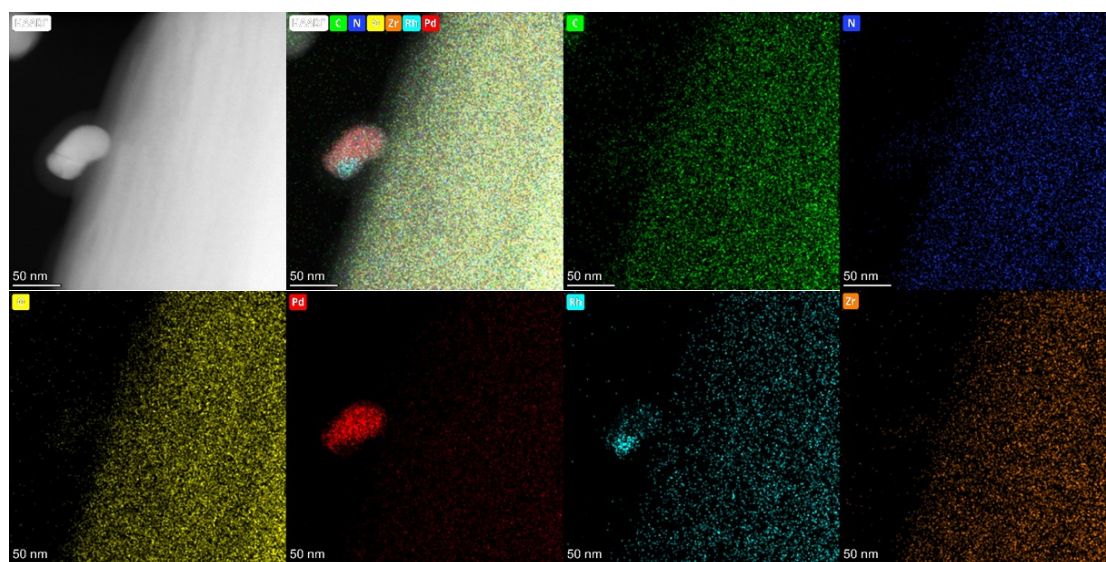

Fig. S4 Elemental mapping of Pd-Rh@PC (0.25 Pd).

Fig. S4 shows that the other elements are evenly distributed.

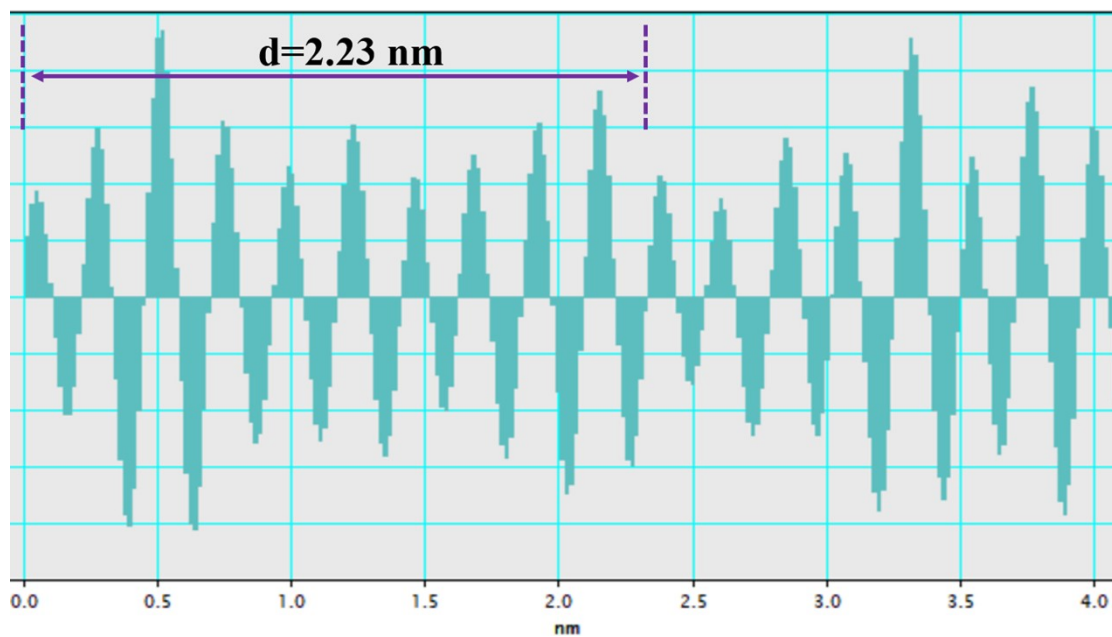

Fig. S5 Lattice spacing of Pd-Rh@PC (0.25 Pd) (taken from the Fig. 2c).

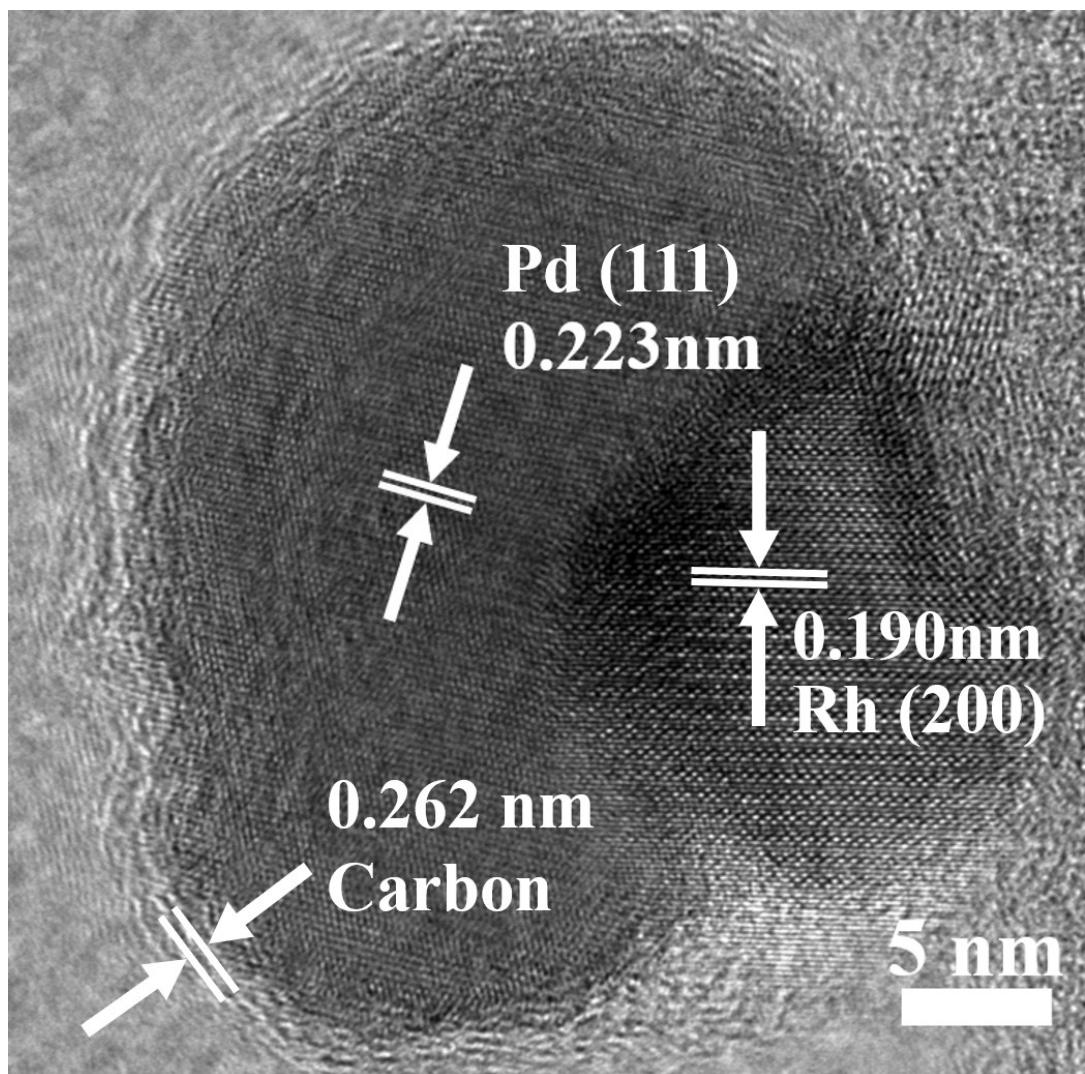

Fig. S6 The HRTEM image of Pd-Rh@PC (0.25 Pd).



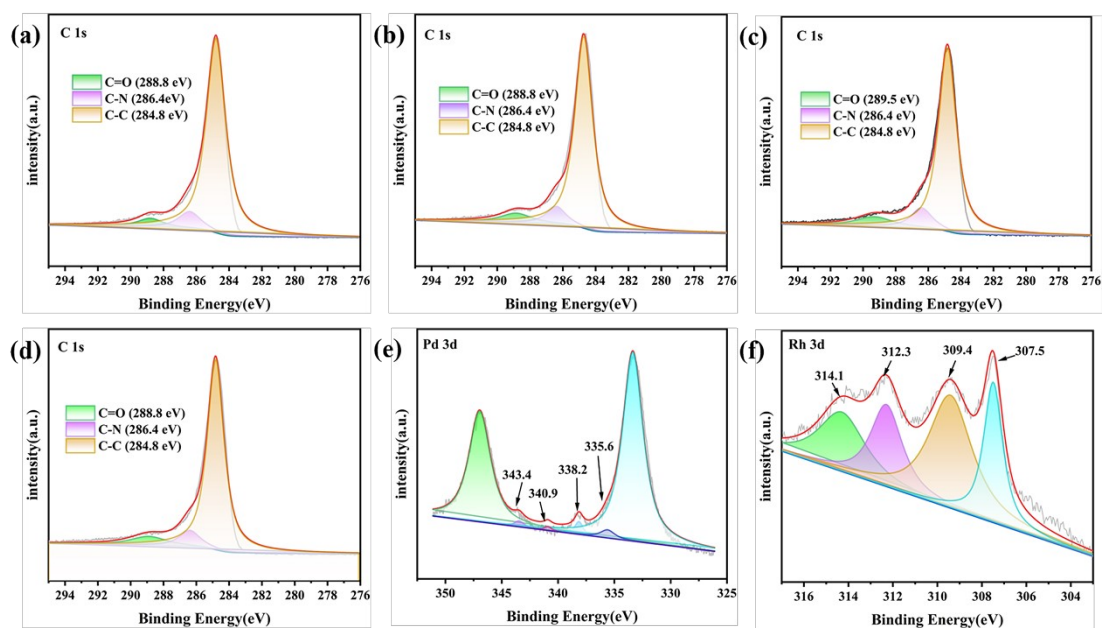

Fig. S7 XPS spectra of C 1s of (a) Pd-Rh@PC (0.5 Pd), (b) Pd-Rh@PC (0.25 Pd), (c) Rh@PC and (d) Pd@PC (0.25 Pd), respectively; XPS spectra of Pd 3d of (e) Pd@PC (0.25 Pd) and Rh 3d of (f) Rh@PC.

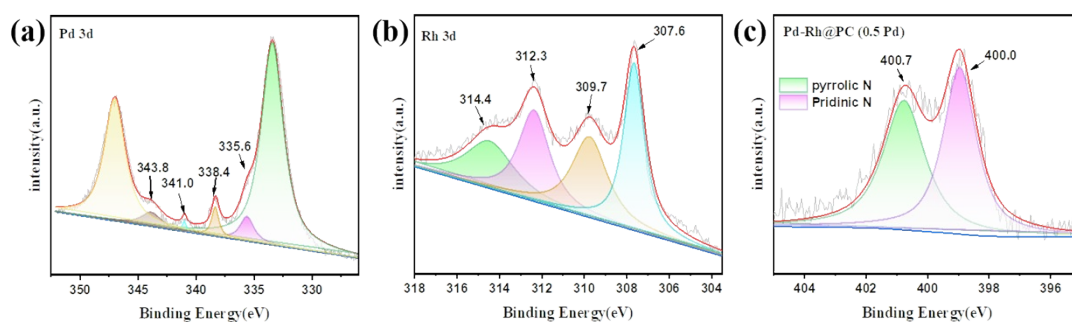

Fig. S8 XPS spectra of (a) Pd 3d, (b) Rh 3d and (c) N 1s of Pd-Rh@PC (0.5 Pd).

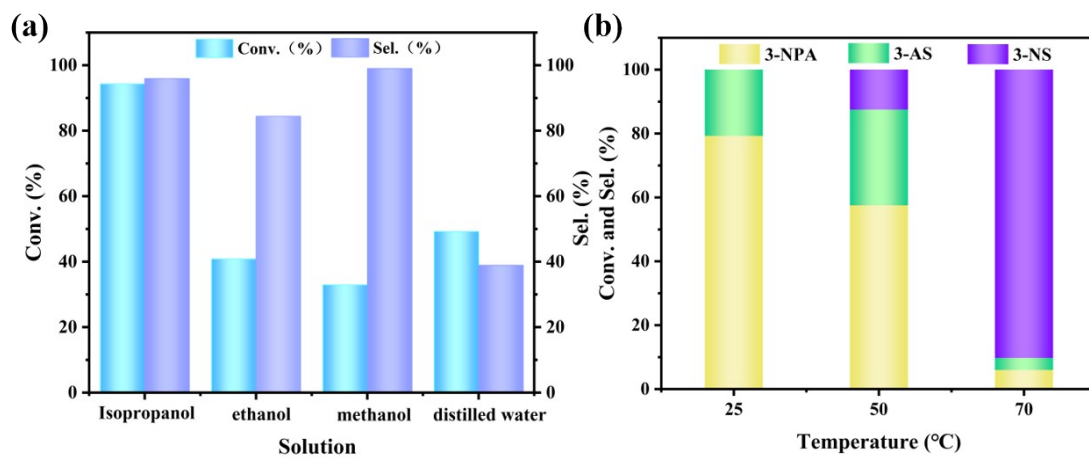

Fig. S9 (a) Different solvents for catalytic reactions; (b) Catalytic reactions at different temperatures.

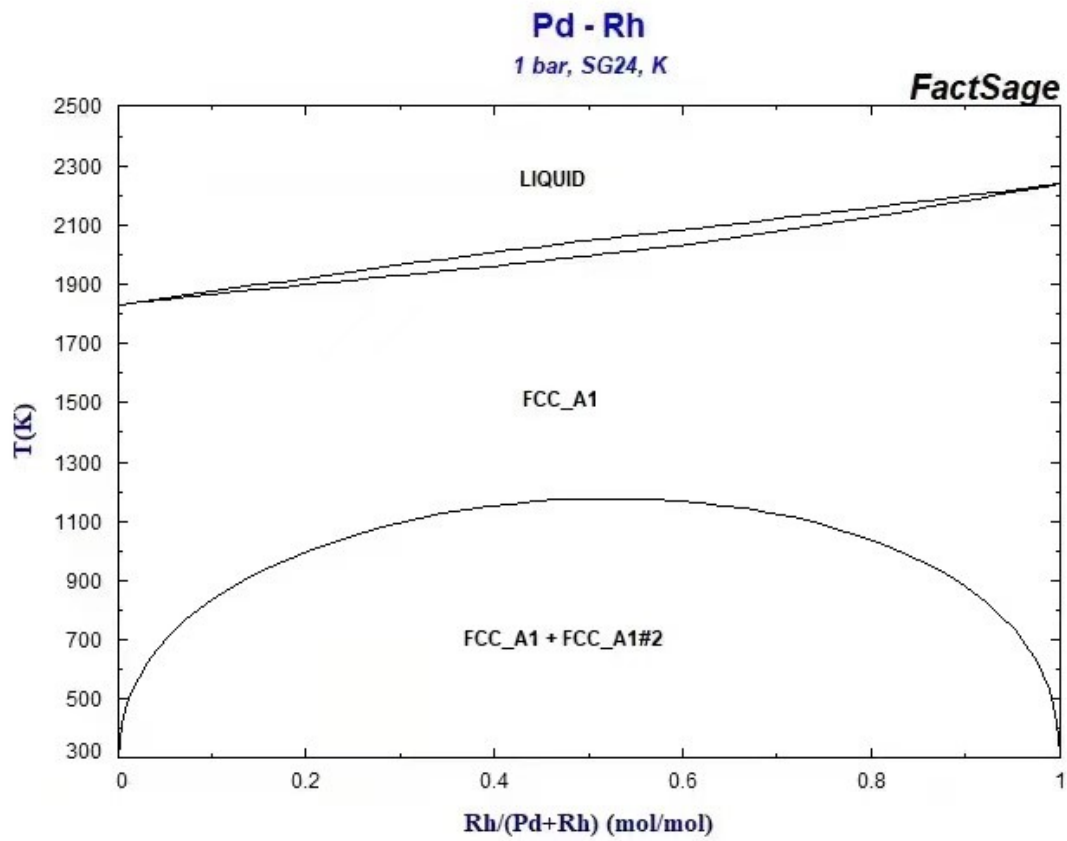

Fig. S10 Solubility Phase Diagram of Pd-Rh.

Table S1

The reduction of nitrobenzene and phenylacetylene over the Pd-Rh@PC (0.25 Pd) catalyst. <sup>[a]</sup>

| Entry | Substrate                                                                         | Catalyst              | Time | Conv. (%) <sup>[b]</sup> | Sel. (%) <sup>[b]</sup> | Product                                                                             |
|-------|-----------------------------------------------------------------------------------|-----------------------|------|--------------------------|-------------------------|-------------------------------------------------------------------------------------|
| 1     | 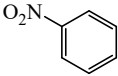 | Pd-Rh@PC<br>(0.25 Pd) | 10 h | 99                       | 99                      |  |
| 2     |  |                       | 10 h | 96                       | 99                      |  |

<sup>[a]</sup> Reaction condition: substrate (1 mmol), catalyst (20 mg), isopropanol (5 mL).

<sup>[b]</sup> Conversion and selectivity were analyzed by GC.

Table S2

The reduction of nitrobenzene and phenylacetylene over the Pd-Rh@PC (0.25 Pd) catalyst. <sup>[a]</sup>

| 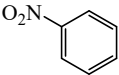 | +                  |  | $\xrightarrow[\text{1 atm H}_2, \text{ Isopropanol}]{\text{Catalyst, 70 }^\circ\text{C}}$ |                          |           |  |  |  |
|-----------------------------------------------------------------------------------|--------------------|-----------------------------------------------------------------------------------|-------------------------------------------------------------------------------------------|--------------------------|-----------|------------------------------------------------------------------------------------|-------------------------------------------------------------------------------------|-------------------------------------------------------------------------------------|
| Substrate 1                                                                       |                    | Substrate 2                                                                       |                                                                                           |                          | Product 1 | Product 2                                                                          | Product 3                                                                           |                                                                                     |
| Entry                                                                             | Catalyst           |                                                                                   | Time (h)                                                                                  | Conv. (%) <sup>[b]</sup> |           |                                                                                    |                                                                                     |                                                                                     |
|                                                                                   |                    |                                                                                   |                                                                                           | 1                        | 2         |                                                                                    |                                                                                     |                                                                                     |
| 1                                                                                 | Pd-Rh@PC (0.25 Pd) |                                                                                   | 10                                                                                        | -                        | 98        |                                                                                    |                                                                                     |                                                                                     |

<sup>[a]</sup> Reaction condition: nitrobenzene (0.5 mmol), phenylacetylene (0.5 mmol), catalyst (20 mg), isopropanol (5 mL).

<sup>[b]</sup> Conversion was analyzed by GC.

Table S3

Comparison of catalyst performance based on selectivity and activity of 3-NPA semi-hydrogenation to 3-NS.

| Entry | Catalyst                            | T (°C) | Hydrogen Source      | Time   | Conv (%) | Sel. (%) | Ref.             |
|-------|-------------------------------------|--------|----------------------|--------|----------|----------|------------------|
| 1     | Co clusters/N-C                     | 60     | 1 atm H <sub>2</sub> | 30 min | 93       | 87       | Ref <sup>5</sup> |
| 2     | [Ir(cod)Cl] <sub>2</sub>            | 70     | Ethanol              | 20 h   | 99       | 93       | Ref <sup>6</sup> |
| 3     | Pd <sub>1</sub> /Ni@G               | 30     | 5 atm H <sub>2</sub> | 8 h    | 99       | 92       | Ref <sup>7</sup> |
| 4     | Au <sub>3</sub> Pd <sub>1</sub> NDs | 15     | 1 atm H <sub>2</sub> | 8 min  | 77       | 98       | Ref <sup>8</sup> |
| 5     | Pd-Rh@PC (0.25 Pd)                  | 70     | 1 atm H <sub>2</sub> | 10 h   | 94       | 96       | This work        |

**Characterization of compounds:**

**3-Nitrostyrene:**

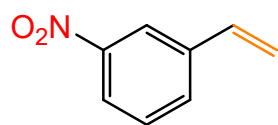

A yellow oil (96%). GC-MS: m/z (%) 149 (96), 103 (87), 77 (100), 51 (37).

**3-Ethylaniline:**

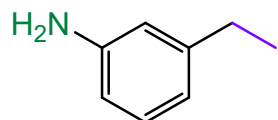

A colorless oil (99%). GC-MS: m/z (%) 121 (85), 106 (100), 77 (22).

## References

1. Y. Chen, W. Huang, C. Wang, X. Zhai, T. Zhang, Y. Wang and X. Hu, *ACS Sustainable Chemistry & Engineering*, 2020, **8**, 13226-13235.
2. Y. Yan, Q. An, Z. Xiao, W. Zheng and S. Zhai, *Chemical Engineering Journal*, 2017, **313**, 475-486.
3. B. Chen, H. Zhao, S. Chen, F. Long, B. Huang, B. Yang and X. Pan, *Chemical Engineering Journal*, 2019, **356**, 69-80.
4. X. He, F. Deng, T. Shen, L. Yang, D. Chen, J. Luo, X. Luo, X. Min and F. Wang, *Journal of Colloid and Interface Science*, 2019, **539**, 223-234.
5. Q. Zhu, X. Lu, S. Ji, H. Li, J. Wang and Z. Li, *Journal of Catalysis*, 2022, **405**, 499-507.
6. C. Wang, S. Gong, Z. Liang, Y. Sun, R. Cheng, B. Yang, Y. Liu, J. Yang and F. Sun, *ACS Omega*, 2019, **4**, 16045-16051.
7. L. Zhao, X. Qin, X. Zhang, X. Cai, F. Huang, Z. Jia, J. Diao, D. Xiao, Z. Jiang, R. Lu, N. Wang, H. Liu and D. Ma, *Adv. Mater.*, 2022, **34**, e2110455.
8. K. Yao, T. Li, C. Zhao, W. Lu, S. Zhao and J. Wang, *ACS Sustainable Chemistry & Engineering*, 2020, **8**, 14914-14926.
